# Supplementary material
Source: publisher site journal article supplement (https://www.degruyterbrill.com/publication/isbn/9783110228632/downloadAsset/9783110228632_Erratum.pdf)
Supplement: Supplementary file 1 [file 9783110228632_Erratum.pdf]

**Verlag de Gruyter**

**Berlin, 20. März 2013**

## **ERRATUM**

**Waldeyer – Anatomie des Menschen | Lehrbuch und Atlas in einem Band**

**19., vollständig überarbeitete und aktualisierte Auflage | ISBN 978-3-11-022862-5**

Liebe Leserinnen und Leser,

wir bedauern außerordentlich, dass in der Ausgabe des oben genannten Titels ein Autor der nachfolgend aufgezählten Unterkapitel und Abbildungen namentlich nicht im Autorenverzeichnis und am Beginn von Kapitel 4 erwähnt wurde und möchten das nun hiermit nachtragen:

- Kapitel 4.2.3, Ventrolaterale Bauchwand
- Kapitel 4.2.4, Hintere Bauchwand
- Kapitel 4.2.5, Leitungsbahnen der Bauchwand
- Kapitel 4.2.6, Angewandte Anatomie, Hernien
- Abbildungen 4.67, 4.71, 4.72, 4.73

Autor dieser oben gelisteten Kapitel und Abbildungen ist

**Herr Prof. Dr. habil. Thomas Beck**

Eschersheimer Landstr. 433

60431 Frankfurt
